# Supplementary material
Source: PubMed Central journal article supplement (PMC7922235)
Supplement: jamainternmed-e209285-s002.pdf [file jamainternmed-e209285-s002.pdf]

## Supplemental Online Content

Gurwitz JH, Kapoor A, Garber L, et al. Effect of a multifaceted clinical pharmacist intervention on medication safety after hospitalization in persons prescribed high-risk medications: a randomized clinical trial. *JAMA Intern Med*. Published online March 1, 2021. doi:10.1001/jamainternmed.2020.9285

**eFigure.** Categories of outcome events

This supplemental material has been provided by the authors to give readers additional information about their work.

**eFigure. Categories of Outcome Events**

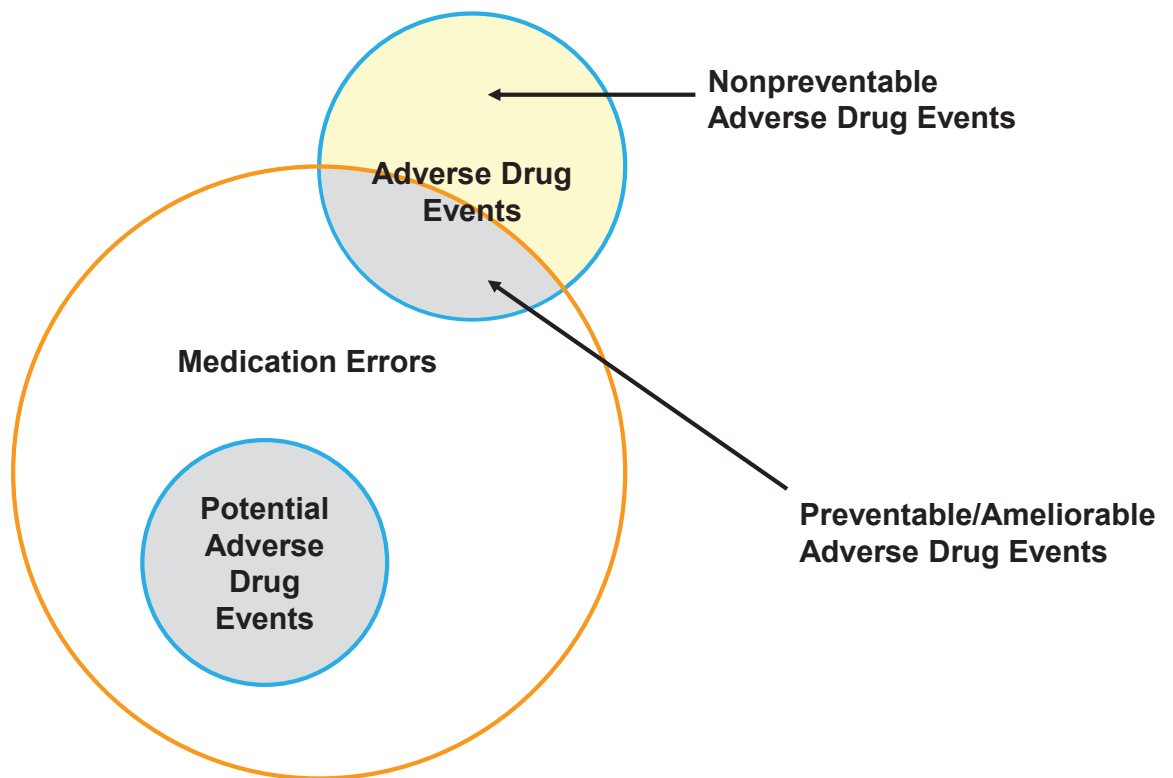

This figure illustrates the relationship among medication errors, preventable/ameliorable adverse drug events (ADEs), potential ADEs, adverse drug-related incidents, and clinically important medication errors. ADEs combined with potential ADEs comprise adverse drug-related incidents (yellow + gray). Clinically important medication errors include preventable/ameliorable ADEs and potential ADEs (gray).
