# Supplementary material
Source: PubMed Central journal article supplement (PMC7922235)
Supplement: jamainternmed-e209285-s003.pdf [file jamainternmed-e209285-s003.pdf]

# Data Sharing Statement

Gurwitz. Effect of A Multifaceted Clinical Pharmacist Intervention on Medication Safety After Hospitalization in Persons Prescribed High-Risk Medications. *JAMA Intern Med.* Published March 01, 2021. doi:10.1001/jamainternmed.2020.9285

## Data

**Data available:** Yes

**Data types:** Deidentified participant data, Data dictionary

**How to access data:** To access these data, please email the study's Principal Investigator, Jerry H. Gurwitz, at [jerry.gurwitz@umassmed.edu](mailto:jerry.gurwitz@umassmed.edu).

**When available:** With publication

## Supporting Documents

**Document types:** Other (please specify)

**Additional Information:** Study Toolkit (including all intervention materials).

**How to access documents:** The Study Toolkit is available at the following website:

<https://umassmed.edu/mpci/education/practicingprofessionals/>

**When available:** beginning date: 03-02-2020

## Additional Information

**Who can access the data:** The requestor must gain consent from the study's Principal Investigator (Gurwitz). The requestor must also sign a non-disclosure agreement.

**Types of analyses:** Requests for data sharing will be reviewed by the study's Principal Investigator (Gurwitz) on a case-by-case basis.

**Mechanisms of data availability:** A fully deidentified dataset (and data dictionary) will be provided to the approved requestor in electronic format.
